# Supplementary material
Source: PubMed Central journal article supplement (PMC3154692)
Supplement: supp_japplphysiol.00040.2011_appendix.pdf [file supp_japplphysiol.00040.2011_appendix.pdf]

## APPENDIX: Description of the mathematical model

Except as noted below, all of the equations of the model are those that were presented previously (4). Changes to the previous model were motivated by the need to represent the effects of both moderate exercise and chronic anemia in order to predict the consequences of CO exposures on women in underdeveloped countries.

Exercise is represented in the model by an increase in the metabolic rate of oxygen consumption ( $MRO_2$ ) in the muscle tissue compartments.  $MRO_2$  in non-muscle tissues is assumed to remain at its resting level during exercise. With normal [Hb] and no CO present, blood flow to muscle is a function of muscle  $MRO_2$ . This function was determined (Figure A1) by fitting a quadratic curve to data from several studies on humans (14, 17, 18, 20) and one on rats (1).

In the model, minute ventilation at rest is either set to the measured value (if reported in the study being simulated) or is set to a value that yields a resting  $PaO_2$  of ~100 Torr. Minute ventilation during exercise is calculated by multiplying resting ventilation by the metabolic rate ratio (MRR)—i. e., the ratio of whole body  $MRO_2$  in exercise to that at rest. Resting cardiac output for normal subjects is calculated from a regression relationship on body weight and gender (reference 8, Eq. C.3). The change in cardiac output due to exercise is calculated using a linear approximation to the relationship presented in a previous model (reference 8, Eq. C.4). Cardiac output also increases in response to an increase in %HbCO (reference 8, Auxiliary Equations following Eq. B.2).

Once minute ventilation ( $V_E$ ) is calculated, tidal volume ( $V_T$ ) and dead space volume ( $V_D$ ) are calculated from additional regression relationships for non-anemic subjects. For male subjects, data from Neder, *et al.*, (15) and Hey, *et al.*, (10) were combined and fit to

a straight line to yield the following equation:  $\dot{V}_E = 28.0 V_T - 10.4$ . Similarly fitting data for females from Neder (15) gives  $\dot{V}_E = 33.3 V_T - 7.6$ . Both equations are easily solved for  $V_T$ .

For anemic subjects we use data from Sproule (19) to obtain:  $\dot{V}_E = 51.15 V_T - 23.13$ . To estimate  $V_D$  we combined data from several studies of normal human subjects (6, 9, 12, 16, 19) and fit these data using a maximum likelihood method with a curvilinear function. The result is (Figure A2):

$$V_D = 0.05 + 0.3892 * 6.7691^{-2.3679} / (6.7691^{-2.3679} + V_T^{-2.3679})$$

For anemic subjects, the only available data are from Sproule (19); a linear fit to these data provides the relationship  $V_D = 0.2385 * V_T + 0.1587$ .

When a specific anemic subject from the literature is simulated, measured cardiac output of that subject is used if it is available. Otherwise, on average in anemic subjects, resting cardiac output exhibits an increasing trend as [Hb] decreases, albeit with considerable between-subject variability. We combined data from Woodson et al., (21), Brannon et al., (3), and Duke and Abelmann (7) and estimated the average trend in cardiac output ( $Q_{dot}$ ) as a power function of [Hb] using a maximum likelihood (MLE) method. The MLE fit for resting cardiac output in ml/min/kg (Figure A3) is

$$Q_{dot} = 51.40([Hb] - 0.0425)^{-0.2448}$$

In all cases, when  $Q_{dot}$  increases above its resting level (i. e., due to exercise, anemia, or CO), the increased flow is divided between muscle and nonmuscle tissues in proportion to their relative metabolic rates of  $O_2$  consumption.

The shape of the oxygen dissociation curve changes in anemia, principally through an effect on 2,3-DPG concentration. To incorporate these changes, we estimated linear fits to data for  $P_{50}$  and Hill exponent,  $n$ , as functions of  $[Hb]$  (2).

Pulmonary shunt fraction (SF) decreases in exercise (5). Without this change in the model, it was necessary to increase ventilation more than linearly with whole-body  $MRO_2$  in order to prevent a decrease in  $PaO_2$ . By trial and error we found that the following relationships between SF and fractional increase in  $Q_{dot}$  ( $dQ$ ) from resting minimized changes in  $PaO_2$  in exercise:

$$\text{for normal subjects, } SF = 0.05 - 0.02 * dQ$$

$$\text{for anemic subjects, } SF = 0.045 - 0.01 * dQ$$

All of the above effects of anemia were calculated in the model as functions of the deviation of  $[Hb]$  from a normal value. Thus, if in a simulation run the specified  $[Hb]$  value was normal, then all of the above effects due to anemia had magnitudes of zero.

In previous versions of our model it was assumed that CO in blood compartments binds to Hb first, then  $O_2$  binds to Hb in an amount which satisfies the Haldane equation. For moderate exercise in anemia, the  $O_2$  content of venous compartments becomes sufficiently low that this approximation yields errors in  $PO_2$ . Therefore, for venous compartments a different approach was utilized. The total  $O_2$  and CO in a compartment are determined first from flux equations. Then  $PO_2$  and  $HbO_2$  are calculated so that dissolved  $O_2$  plus  $HbO_2$  equal the total  $O_2$  content. Finally, a gradient search method is used to determine the COHb and  $P_{co}$  which yield an equivalent total pressure ( $P_{eq} = PO_2 + M_H * P_{co}$ ) and total bound Hb that satisfy the  $O_2$  dissociation curve (whose parameters change with COHb).  $M_H$

is the Haldane coefficient for blood. As noted above, dissolved CO content is ignored in all blood compartments.

The predicted effects of the combination of exercise with anemia were evaluated by performing two sets of simulations at various levels of exercise using the same subject-specific parameters (from subject LB of Brannon (3)) except for [Hb], which was set to 9.9 g/dl in anemia and 13 g/dl for the normal case. Note that some parameters and variables other than [Hb] would be different in the two cases because all of the effects ascribed to anemia would have magnitudes of zero when [Hb] equals 13. Furthermore, in this case the model calculate and removes the effects of anemia on cardiac output and ventilation since those effects were included in the experimental measurements. Figure A4 demonstrates that anemia generally results in lower  $PO_2$  levels at any  $MRO_2$ , but the qualitative effects of changes in  $MRO_2$  are rather similar at both [Hb] levels.

## REFERENCES

1. **Behnke BJ, McDonough P, Padilla DJ, Musch TI, Poole DC.** Oxygen exchange profile in rat muscles of contrasting fibre types. *J Physiol* 549: 597-605, 2003.
2. **Böning D, Enciso G.** Hemoglobin-oxygen affinity in anemia. *Blut* 54: 361-368, 1987.
3. **Brannon ES, Merrill AJ, Warren JV, Stead EA.** The Cardiac Output in Patients with Chronic Anemia as Measured by the Technique of Right Atrial Catheterization. *J Clin Invest* 24: 332-336, 1945.
4. **Bruce EN, Bruce MC, Erupaka K.** Prediction of the rate of uptake of carbon monoxide from blood by extravascular tissues. *Respir Physiol Neurobiol* 161: 142-159, 2008.

5. **Calbet JA, Lundby C.** Air to muscle O<sub>2</sub> delivery during exercise at altitude. *High Alt Med Biol* 10: 123-134, 2009.
6. **Damato S, Cumming G.** Tidal volume change and gas mixing in the lung. *Respiration* 56:173-181, 1989.
7. **Duke M, Abelmann WH.** The hemodynamic response to chronic anemia. *Circulation* 39: 503-515, 1969.
8. **Erupaka K, Bruce EN, Bruce MC.** Prediction of extravascular burden of carbon monoxide (CO) in the human heart. *Ann Biomed Eng* 38: 403-438, 2010
9. **Furuike AN, Sue DY, Hansen JE, Wasserman K.** Comparison of physiologic dead space/tidal volume ratio and alveolar-arterial PO<sub>2</sub> difference during incremental and constant work exercise. *Am Rev Respir Dis* 126: 579-583, 1982.
10. **Hey EN, Lloyd BB, Cunningham DJ, Jukes MG, Bolton DP.** Effects of various respiratory stimuli on depth and frequency of breathing in man. *Resp Physiol* 1: 193-205, 1966.
11. **Kay JD, Petersen ES, Vejby-Christensen H.** Breathing in man during steady-state exercise on the bicycle at two pedalling frequencies, and during treadmill walking. *J Physiol* 251: 645-656, 1975.
12. **Lamarra N, Ward SA, Whipp BJ.** Breath-by-breath determination of mean alveolar PCO<sub>2</sub> and series dead space during muscular exercise. *FASEB J* 2: A305, 1988
13. **Lewis SF, Taylor WF, Graham RM, Pettinger WA, Schutte JE, Blomqvist CG.** Cardiovascular responses to exercise as functions of absolute and relative work load. *J Appl Physiol* 54: 1314-1323, 1983.

**14. Marsh RL, Ellerby DJ.** Partitioning locomotor energy use among and within muscles. Muscle blood flow as a measure of muscle oxygen consumption. *J Exp Biol* 209:2385-2394, 2006.

**15. Neder JA, Dal Corso S, Malaguti C, Reis S, De Fuccio MB, Schmidt H, Fuld JP, Nery LE.** The pattern and timing of breathing during incremental exercise: a normative study. *Eur Respir J* 21: 530-538, 2003.

**16. Nunn JF, Hill DW.** Respiratory dead space and arterial to end-tidal carbon dioxide tension difference in anesthetized man. *J Appl Physiol* 15: 383-389, 1960.

**17. Rådegran G.** Limb and skeletal muscle blood flow measurements at rest and during exercise in human subjects. *Proc Nutr Soc* 58: 887-898, 1999.

**18. Richardson RS, Knight DR, Poole DC, Kurdak SS, Hogan MC, Grassi B, Wagner PD.** Determinants of maximal exercise VO<sub>2</sub> during single leg knee-extensor exercise in humans. *Am J Physiol* 268: H1453-461, 1995.

**19. Sproule BJ, Mitchell JH, Miller WF.** Cardiopulmonary physiological responses to heavy exercise in patients with anemia. *J Clin Invest* 39: 378-388, 1960.

**20. Van Beekvelt MC, Colier WN, Wevers RA, Van Engelen BG.** Performance of near-infrared spectroscopy in measuring local O<sub>2</sub> consumption and blood flow in skeletal muscle. *J Appl Physiol* 90: 511-519, 2001.

**21. Woodson RD, Wills RE, Lenfant C.** Effect of acute and established anemia on O<sub>2</sub> transport at rest, submaximal and maximal work. *J Appl Physiol.* 44:36-43, 1978.

## Figure Legends

Figure A1. Variation of muscle blood flow ( $Q_m$ ) with muscle rate of oxygen consumption ( $V_mO_2$ ). Squares: data from several experimental studies, as described in the text.

Line: plot of the least squares regression fit to the data points given by

$$Q_m = -0.1246(V_mO_2)^2 + 7.596(V_mO_2) + 1.8631.$$

Figure A2. Variation of physiological dead space volume ( $V_D$ ) with tidal volume ( $V_T$ ) in normal subjects. Asterisks: data from multiple experimental studies, as described in the text. Line: plot of a maximum likelihood fit to the data, given by the equation

$$V_D = 0.05 + 0.3892 * 6.7691^{-2.3679} / (6.7691^{-2.3679} + V_T^{-2.3679}).$$

Figure A3. Variation of resting cardiac output ( $Q_{dot}$ ) with hemoglobin concentration ( $[Hb]$ ).

Diamonds: data from several experimental studies, as described in the text. Line: plot of a maximum likelihood fit to the data, given by the equation

$$Q_{dot} = 51.40([Hb] - 0.0425)^{-0.2448}.$$

Figure A4. Responses to exercise predicted by the model for an anemic subject with  $[Hb]$  of

9.9 g/dl and for the same subject if she had a normal  $[Hb]$  of 13 g/dl. A. arterial oxygen partial pressure ( $PaO_2$ ). B. oxygen partial pressure in the capillary blood compartment of muscle ( $P_{cap}O_2$ ). C. Cardiac output and muscle blood flow (see key). D.  $PO_2$  in the arteriolar-venular (ar-ven) and capillary (cap,t) compartments of muscle tissue. In all cases the x-axis is whole-body oxygen consumption ( $MRO_2$ )
