# Supplementary material
Source: PubMed Central journal article supplement (PMC3154692)

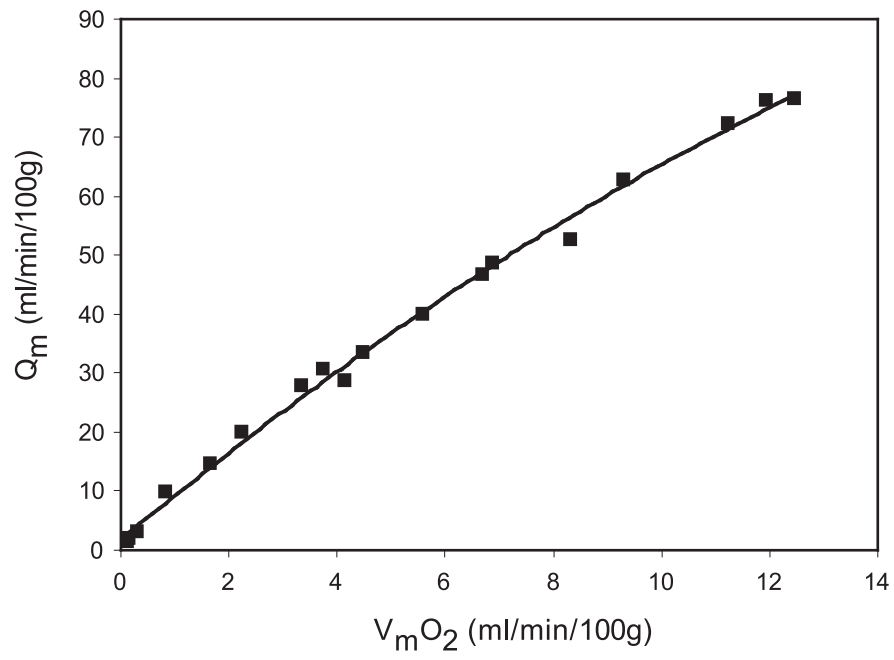

Figure A1.

Supplement: supp_japplphysiol.00040.2011_figS1.pdf [file supp_japplphysiol.00040.2011_figS1.pdf]

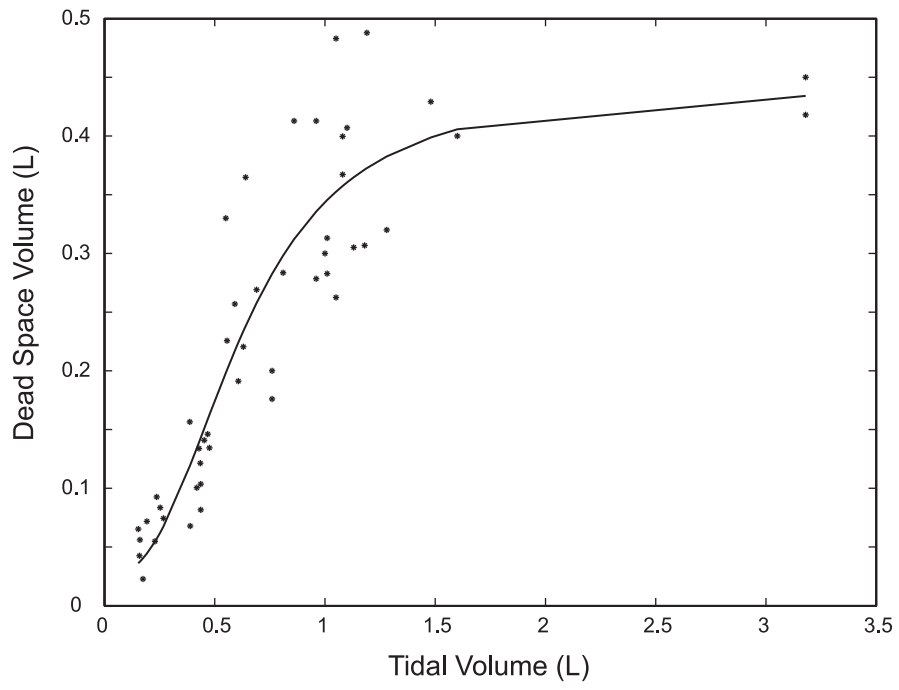

Figure A2.

Supplement: supp_japplphysiol.00040.2011_figS2.pdf [file supp_japplphysiol.00040.2011_figS2.pdf]

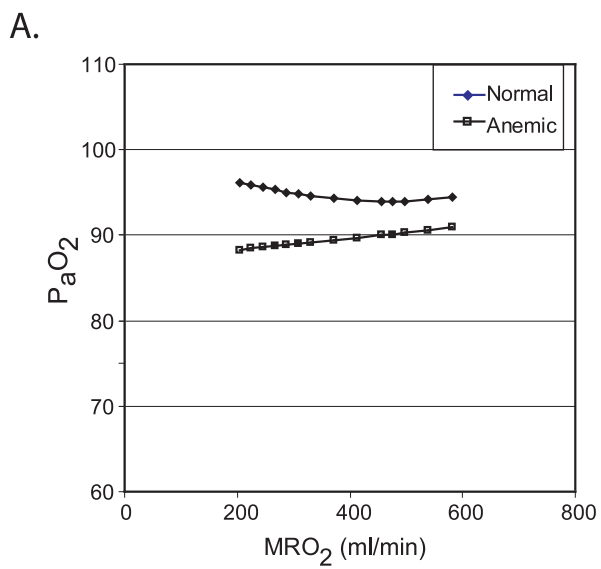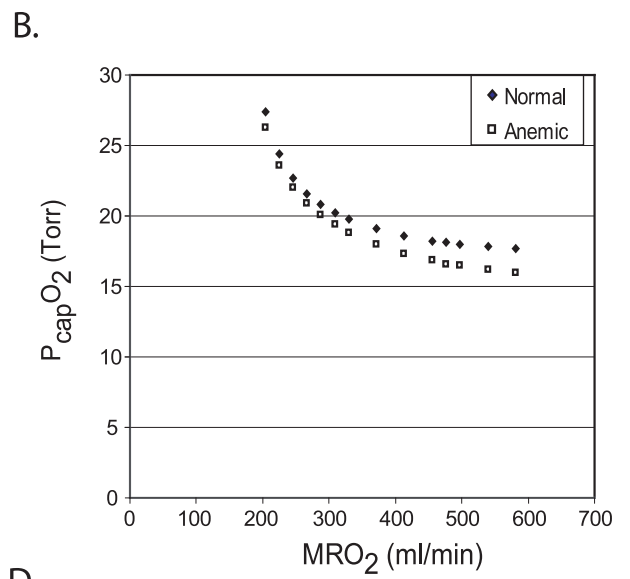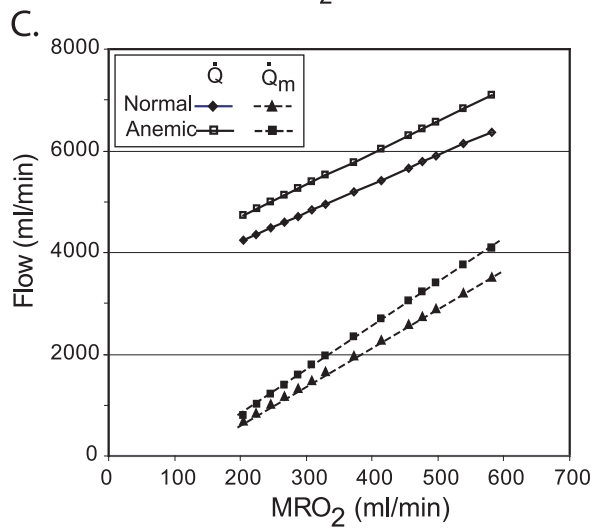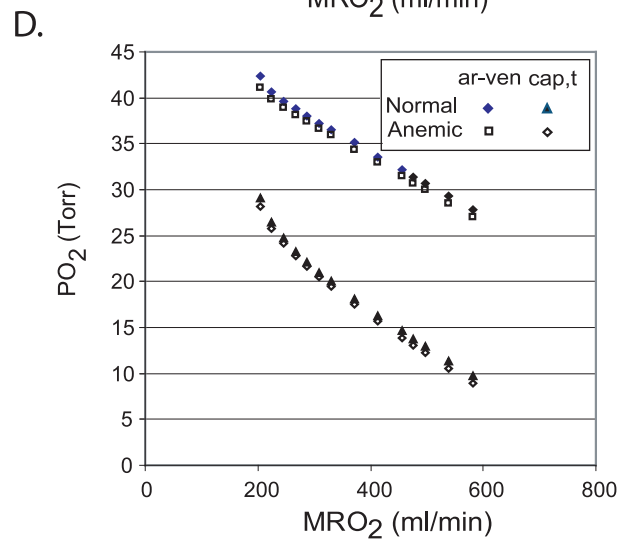

Figure A4.

Supplement: supp_japplphysiol.00040.2011_figS4.pdf [file supp_japplphysiol.00040.2011_figS4.pdf]
